# Supplementary material for: Biocrude production via hydrothermal liquefaction of Canadian lignocellulosic residues for sustainable transportation: screening, catalytic effect, and modelling
Source: Royal Society of Chemistry journal article supplement (doi:10.1039/d4se00878b), 2024-01-01
Supplement: d4se00878b1.xlsx [file d4se00878b1.xlsx]

## Sheet: Supplemental Information
	Supplemental information
	Production of Sustainable Biocrude via Hydrothermal Liquefaction of Canadian Lignocellulosic Residues for Renewable Transportation Fuels: Screening, Catalytic Effect, and Modelling
	Churchill, J. G. B.a, Borugadda, V. B.a,b, Dalai, A. K.*a
	a. Catalysis and Chemical Reaction Engineering Laboratories, Department of Chemical and Biological Engineering, University of Saskatchewan, S7N 5A9, Canada b. Tidewater Renewables Ltd., Calgary, T2P 0B4, Canada
	*Corresponding author:
	Dr. Ajay K. Dalai
	Distinguished Professor of Chemical Engineering and Canada Research Chair in Bio-Energy and Environmentally Friendly Chemical Processing
	Department of Chemical and Biological Engineering
	University of Saskatchewan
	Saskatoon, Saskatchewan, Canada
	Email: ajay.dalai@usask.ca
	Tel: +1 (306) 966-4771

## Sheet: Raw GC-MS Data
1. Raw GC-MS Data with Compounds Identified
Catalytic Aspen Wood			Non-catalytic Aspen Wood			Catalytic Barley Straw			Non-catalytic Barley Straw
Compound	Area %		Compound	Area %		Compound	Area %		Compound	Area %
2-Cyclopenten-1-one, 2-methyl-	0.0258914		Phenol	0.0374209		2-Cyclopenten-1-one, 2-methyl-	0.0219746		2-Cyclopenten-1-one, 2-methyl-	0.00838605
Phenol	0.0111938		Phenol, 2-methoxy-	0.060896		2-Cyclopenten-1-one, 2,3-dimethyl-	0.0239877		Phenol	0.0119318
2-Cyclopenten-1-one, 2,3-dimethyl-	0.0178654		Phenol, 4-ethyl-	0.0083143		1-Pentyne, 3-methyl-	0.0229875		Phenol, 2-methoxy-	0.0918147
2-Cyclopenten-1-one, 2,3-dimethyl-	0.00775803		Phenol, 4-ethyl-2-methoxy-	0.0198305		Phenol, 2-methoxy-	0.150358		Phenol, 4-ethyl-	0.0264548
Phenol, 2-methoxy-	0.0891769		Phenol, 2,6-dimethoxy-	0.172385		Phenol, 4-ethyl-	0.0285036		Phenol, 4-ethyl-2-methoxy-	0.0852629
Phenol, 4-ethyl-	0.00791554		Benzaldehyde, 3-hydroxy-4-methoxy-	0.00774833		Creosol	0.00886048		Phenol, 2,6-dimethoxy-	0.10639
Phenol, 4-ethyl-2-methoxy-	0.0316355		3,5-Dimethoxy-4-hydroxytoluene	0.0117		Phenol, 4-ethyl-2-methoxy-	0.117966		Ethanone, 1-(2,6-dihydroxy-4-methoxyphenyl)-	0.0150196
Phenol, 2,6-dimethoxy-	0.165558		Ethanone, 1-(2,6-dihydroxy-4-methoxyphenyl)-	0.0208174		Phenol, 2,6-dimethoxy-	0.0688154		Homosyringaldehyde	0.012534
Phenol, 2-methoxy-4-propyl-	0.0205885		Homosyringaldehyde	0.0114328		2-Naphthalenol, 3-methoxy-	0.0238		2-Naphthalenol, 3-methoxy-	0.0294979
3,5-Dimethoxy-4-hydroxytoluene	0.0117201		Benzaldehyde, 4-hydroxy-3,5-dimethoxy-	0.0103898		Phenol, 2-methoxy-4-propyl-	0.0194101		2-Pentadecanone	0.0155415
Ethanone, 1-(2,6-dihydroxy-4-methoxyphenyl)-	0.0397982		Ethanone, 1-(4-hydroxy-3,5-dimethoxyphenyl)-	0.00743967		Ethanone, 1-(2,6-dihydroxy-4-methoxyphenyl)-	0.0171534		Ethanone, 1-(4-hydroxy-3,5-dimethoxyphenyl)-	0.0544876
Homosyringaldehyde	0.0495592		Syringylacetone	0.0149256		Homosyringaldehyde	0.0202608		Tetradecanoic acid	0.0201413
Ethanone, 1,1'-(6-hydroxy-2,5-benzofurandiyl)bis-	0.00874948		Ethanone, 1,1',1''-(1,3,5-benzenetriyl)tris-	0.00888867		2-Dodecanone	0.0157088		Undecane	0.00550445
n-Hexadecanoic acid	0.069815		Ethanone, 1,1'-(6-hydroxy-2,5-benzofurandiyl)bis-	0.00601141		Ethanone, 1-(4-hydroxy-3,5-dimethoxyphenyl)-	0.0229876		2-Hexadecanone	0.0241343
(-)-Nortrachelogenin	0.0275176		n-Hexadecanoic acid	0.0759362		Tetradecanoic acid	0.0124745		n-Hexadecanoic acid	0.0908734
2-Propanone, 1-(4-hydroxy-3-methoxyphenyl)-	0.0111602		13-Octadecenal, (Z)-	0.0130949		2-Tetradecanone	0.0178857		2-Methyl-1,8-octanediol	0.00836671
Cyclohexane, (ethoxymethoxy)-	0.0702875		Oleic Acid	0.019644		n-Hexadecanoic acid	0.0763652		2-Propanone, 1-hydroxy-3-(4-hydroxy-3-methoxyphenyl)-	0.0182492
Heptane, 1,1-diphenyl-	0.0193166		(-)-Nortrachelogenin	0.017833		Fumaric acid, dipropargyl ester	0.0159927		9-Octadecenamide, (Z)-	0.0112706
(E)-3,3'-Dimethoxy-4,4'-dihydroxystilbene	0.0125888		Cyclohexane, (ethoxymethoxy)-	0.0540814		(-)-Nortrachelogenin	0.0119358		(E)-3,3'-Dimethoxy-4,4'-dihydroxystilbene	0.0176675
Benzene, 1,1'-tetradecylidenebis-	0.0430784		Homovanillyl alcohol	0.0155934		9-Octadecenamide, (Z)-	0.0230598		Benzene, 1,1',1'',1'''-(1,6-hexanediylidene)tetrakis-	0.0109145
3,4-Divanillyltetrahydrofuran	0.0135283		(E)-3,3'-Dimethoxy-4,4'-dihydroxystilbene	0.0297262		2-Hexyl-1-octanol	0.0335648		2-Butylamine, N-octadecyl-	0.0096981
Total area (%)	0.754702		Syringylacetone	0.0422817		Decane, 2,9-dimethyl-	0.0156427		1-Decanol, 2-hexyl-	0.0500181
			3,4-Divanillyltetrahydrofuran	0.0206931		Total area (%)	0.769696		4H-1-Benzopyran-4-one, 3-(3,4-dimethoxyphenyl)-6,7-dimethoxy-	0.00731501
			4-(4-Hydroxy-3-methoxystyryl)-2,6-dimethoxyphenol	0.0171874					Total area (%)	0.731474
			4,4'-Stilbenediol, 3,3',5,5'-tetramethoxy-	0.021416
			Total area (%)	0.725688
